# Supplementary material
Source: publisher figshare collection journal article supplement (https://acs.figshare.com/ndownloader/files/3801220)
Supplement: Supplementary file 1 [file 3801220]

## Supporting Information

**Temperature-dependent conversion of magnesium citrate into nanoporous carbon materials for superior supercapacitor application via a multi-template carbonization method**

**Yan Qi Zhu, Hai Tao Yi, Xiang Ying Chen\*, Zheng Hui Xiao\***

*School of Chemistry and Chemical Engineering, Anhui Key Laboratory of Controllable Chemistry Reaction & Material Chemical Engineering, Hefei University of Technology, Hefei, Anhui 230009, P. R. China. \*Corresponding author. Tel./Fax: +86-551-62901450. E-mail: [cxyhfut@gmail.com](mailto:cxyhfut@gmail.com).*

## 1. Structure characterization measurements employed in this work.

X-ray diffraction (XRD) patterns were obtained on a Rigaku D/MAX2500V with Cu K $\alpha$  radiation. Raman spectra were recorded at ambient temperature on a Spex 1403 Raman spectrometer with an argon-ion laser at an excitation wavelength of 514.5 nm. Field emission scanning electron microscopy (FESEM) images were taken with a Hitachi S-4800 scanning electron microscope. High-resolution transmission electron microscope (HRTEM) images and selected area electron diffraction (SAED) patterns were performed with a JEM-2100F unit. The specific surface area and pore structure of the carbon samples were determined by N<sub>2</sub> adsorption-desorption isotherms at 77 K (Quantachrome Autosorb-iQ) after being vacuum-dried at 150 °C overnight. The specific surface areas were calculated by a BET (Brunauer-Emmett-Teller) method. Cumulative pore volume and pore size distribution were calculated by using a slit/cylindrical nonlocal density functional theory (NLDFT) model.

## 2. Electrochemical measurements employed in this work.

Measurements conducted in a three-electrode system using 6 mol L<sup>-1</sup> KOH as electrolyte as followed. A mixture of 80 wt% the carbon sample (~ 4 mg), 15 wt% acetylene black and 5 wt% polytetrafluoroethylene (PTFE) binder was fabricated using ethanol as a solvent. Slurry of the above mixture was subsequently pressed onto nickel foam under a pressure of 20 MPa, serving as the current collector. The prepared electrode was placed in a vacuum drying oven at 120 °C for 24 h. A three electrode experimental setup taking a 6 mol L<sup>-1</sup> KOH aqueous solution as electrolyte was used in cyclic voltammetry and galvanostatic charge-discharge measurements on an electrochemical working station (CHI660D, ChenHua Instruments Co. Ltd., Shanghai). Here, the prepared electrode, platinum foil (6 cm<sup>2</sup>) and saturated calomel electrode (SCE) were used as the working, counter and reference electrodes, respectively.

Specific capacitances derived from cyclic voltammetry tests can be calculated from the equation:

$$C = \frac{1}{mv(V_b - V_a)} \int_{V_a}^{V_b} IdV$$

where C (F g<sup>-1</sup>) is the specific capacitance; *m* (g) is the mass of active materials loaded in working electrode; *v* (V s<sup>-1</sup>) is the scan rate; *I* (A) is the discharge current; *V<sub>b</sub>* and *V<sub>a</sub>* (V) are high and low voltage limit of the CV tests.

Specific capacitances derived from galvanostatic tests can be calculated from the equation:

$$C = \frac{I\Delta t}{m\Delta V}$$

where  $C$  ( $\text{F g}^{-1}$ ) is the specific capacitance;  $I$  (A) is the discharge current;  $\Delta t$  (s) is the discharge time;  $\Delta V$  (V) is the voltage window; and  $m$  (g) is the mass of active materials loaded in working electrode.

Measurements conducted in a two-electrode system using [EMIm]BF<sub>4</sub>/AN as electrolyte as followed. In a two-electrode cell, [EMIm]BF<sub>4</sub> and acetonitrile (AN) (weight ratio of 1:1) was adopted as electrolyte. A glassy paper separator was sandwiched between two electrodes, and each electrode contains a mixture of 80 wt% the carbon sample (~ 2 mg), 15 wt% acetylene black and 5 wt% polytetrafluoroethylene (PTFE) binder. Nickel foam serves as the current collector. The assembly of the test cell was done in a glove box filled with Ar.

Specific capacitances derived from cyclic voltammetry tests can be calculated from the equation:

$$C = \frac{2}{mv(V_b - V_a)} \int_{V_a}^{V_b} IdV$$

where  $C$  ( $\text{F g}^{-1}$ ) is the specific capacitance;  $m$  (mg) is the mass of active materials loaded in working electrode;  $v$  ( $\text{V s}^{-1}$ ) is the scan rate;  $I$  (A) is the discharge current;  $V_b$  and  $V_a$  (V) are high and low voltage limit of the CV tests.

Specific capacitances derived from galvanostatic tests can be calculated from the equation:

$$C = \frac{4I\Delta t}{m\Delta V}$$

where  $C$  ( $\text{F g}^{-1}$ ) is the specific capacitance;  $I$  (A) is the discharge current;  $\Delta t$  (s) is the discharge time;  $\Delta V$  (V) is the voltage window; and  $m$  (g) is the total mass of two electrodes.

Specific energy density (E) and specific power density (P) derived from galvanostatic tests can be calculated from the equations:

$$E = \frac{1}{8} C \Delta V^2$$

$$P = \frac{E}{\Delta t}$$

where  $E$  ( $\text{Wh kg}^{-1}$ ) is the average energy density;  $C$  ( $\text{F g}^{-1}$ ) is the specific capacitance;  $\Delta V$  (V) is the voltage window;  $P$  ( $\text{W kg}^{-1}$ ) is the average power density and  $\Delta t$  (s) is the discharge time.

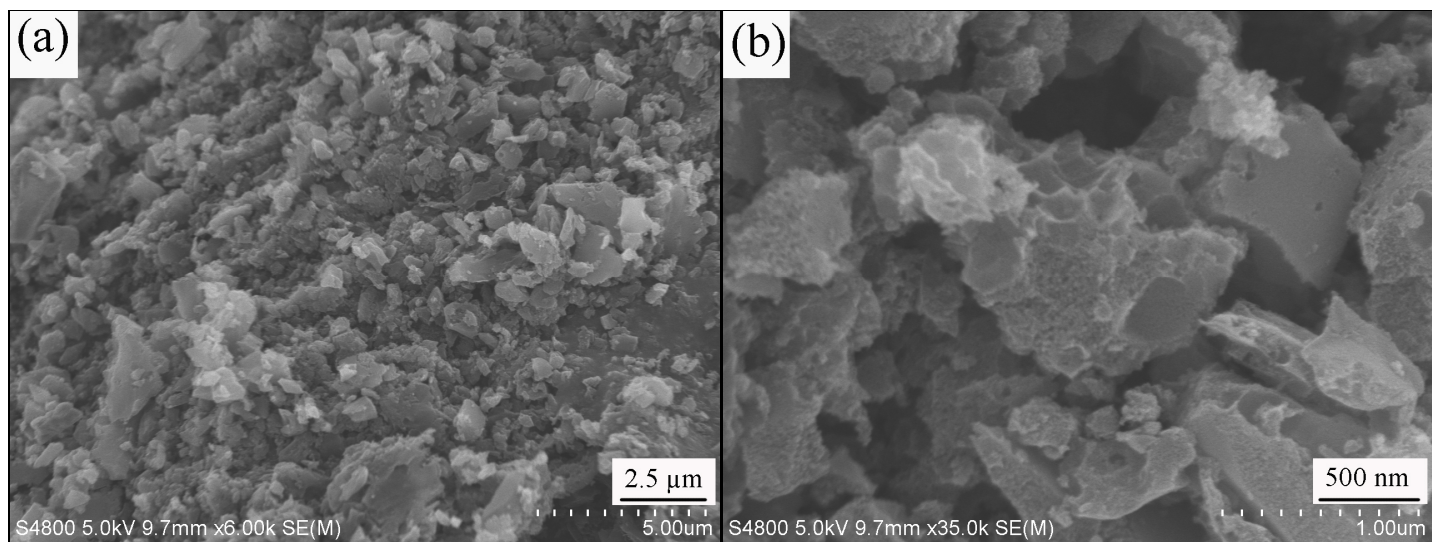

**Figure S1.** (a) and (b): FESEM images of the **C-4:1-900** sample in different magnifications.

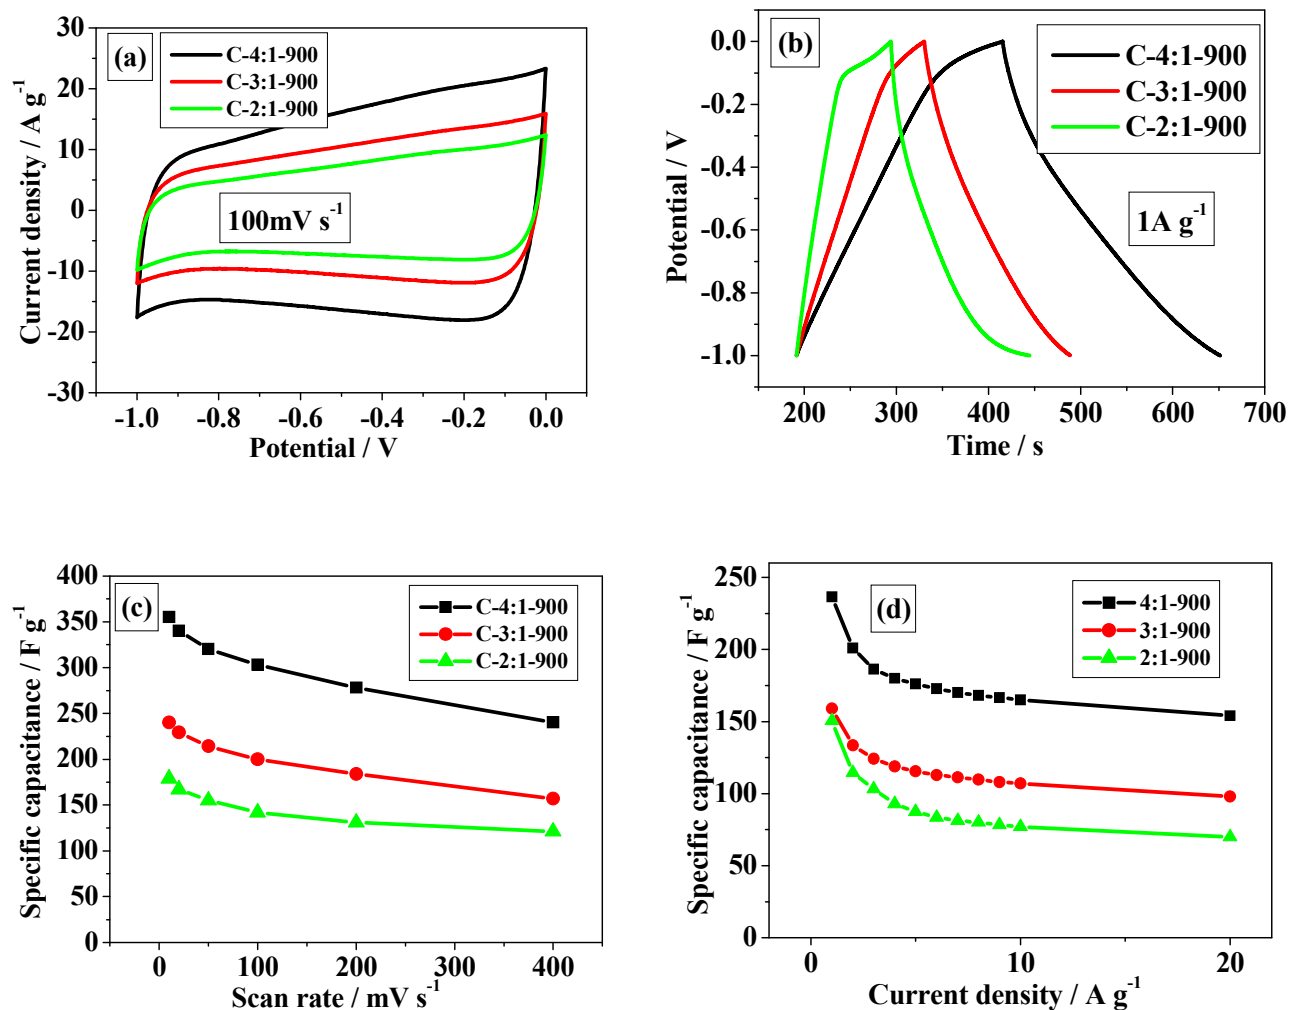

**Figure S2.** C-2:1/3:1/4:1-900 samples in a three-electrode system using 6 mol L<sup>-1</sup> KOH as the electrolytes: (a) CV curves at 100 mV s<sup>-1</sup>; (b) GCD curves of at 1 A g<sup>-1</sup>; (c) specific capacitances calculated from CV curves; (d) specific capacitances calculated from GCD curves.

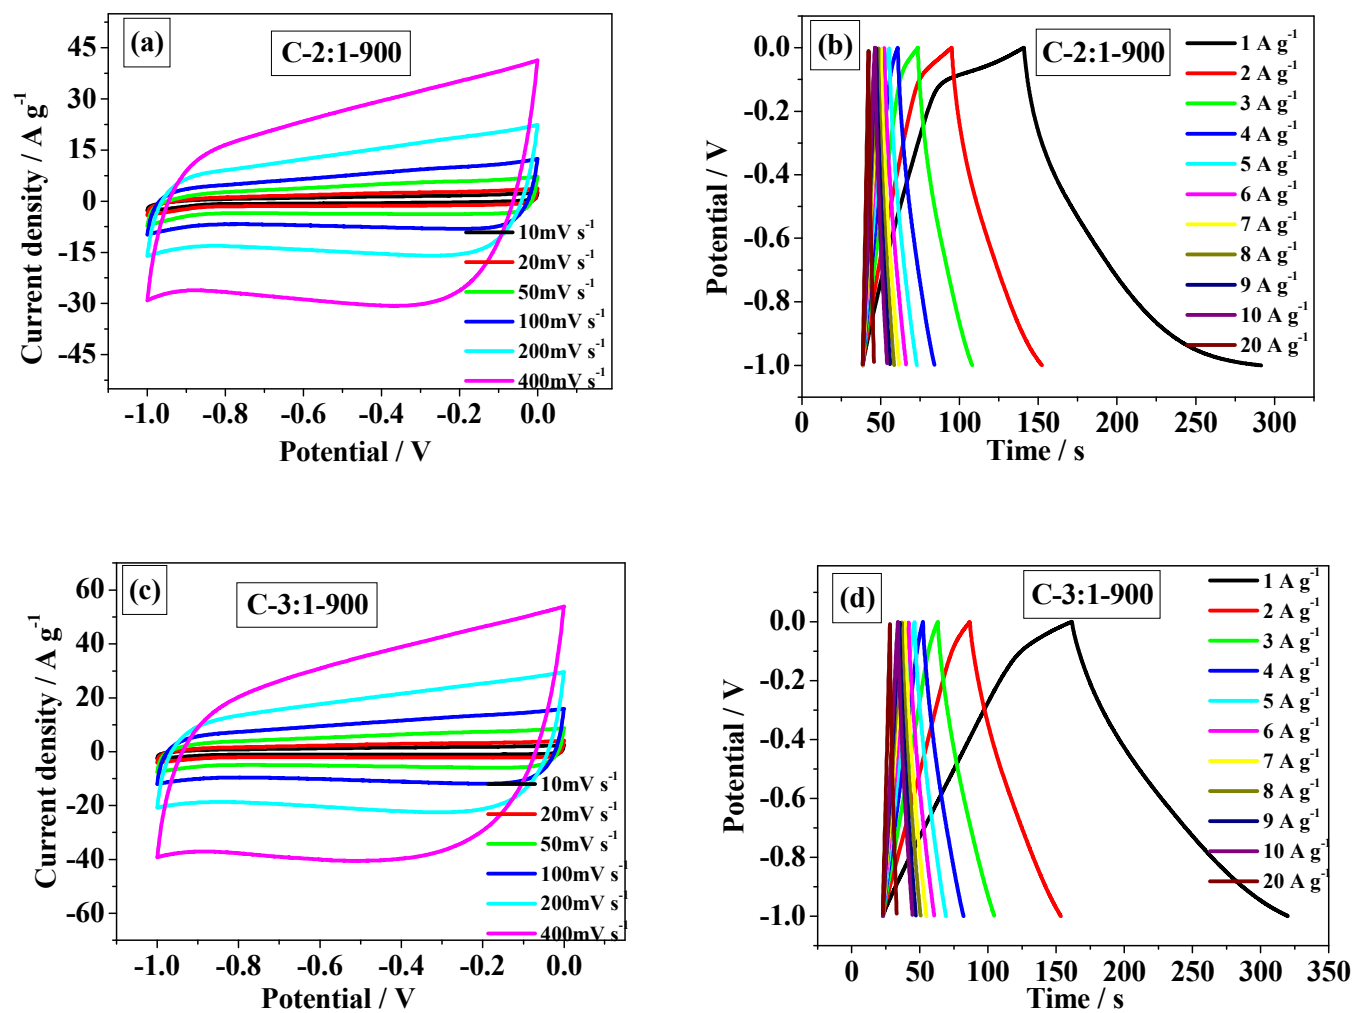

**Figure S3.** C-2:1/3:1-900 samples in a three-electrode system using 6 mol L<sup>-1</sup> KOH as the electrolytes: (a, c) CV curves; (b, d) GCD curves.
